# Supplementary material for: Risk Assessment of Hepatocellular Carcinoma Using Transient Elastography Vs. Liver Biopsy in Chronic Hepatitis B Patients Receiving Antiviral Therapy
Source: PubMed Central journal article supplement (PMC4998368; doi:10.1097/md.0000000000002985), 2016-03-25

**Supplementary table 1. Diagnostic performances of TE and the optimal LS cutoff values for each fibrosis stage**

| <b>Variables</b>          | <b>≥F2</b>    | <b>≥F3</b>    | <b>F4</b>     |
|---------------------------|---------------|---------------|---------------|
| Number of patients, n (%) | 337           | 244           | 148           |
| AUC                       | 0.804         | 0.830         | 0.824         |
| 95% CI                    | 0.747 - 0.862 | 0.786 - 0.874 | 0.783 - 0.865 |
| <i>P</i> value            | <0.001        | <0.001        | <0.001        |
| Cutoff value (kPa)        | 7.5           | 9.5           | 11.5          |
| Sensitivity (%)           | 79.5          | 76.6          | 75.7          |
| Specificity (%)           | 65.9          | 80.3          | 79.0          |

TE, transient elastography; LS, liver stiffness; AUC, area under the receiver operating characteristic curve; CI, confidence interval; kPa, kilopascal.

**Supplementary table 2. Independent risk factors of HCC development**

| Variables                                       | Hepatocellular carcinoma |                                    |                |
|-------------------------------------------------|--------------------------|------------------------------------|----------------|
|                                                 | Univariate               | Multivariate using liver stiffness |                |
|                                                 | <i>P</i> value           | Hazard ratio (95% CI)              | <i>P</i> value |
| <b><i>Demographic variables</i></b>             |                          |                                    |                |
| Age (years)                                     | <0.001                   | 1.156 (1.076-1.242)                | <0.001         |
| Male gender                                     | 0.702                    |                                    |                |
| Heavy alcohol consumption (vs. social and none) | 0.232                    |                                    |                |
| Hypertension                                    | 0.419                    |                                    |                |
| Diabetes mellitus                               | 0.015                    | 0.593 (0.160-2.196)                | 0.434          |
| Body mass index (kg/m <sup>2</sup> )            | 0.908                    |                                    |                |
| Clinical cirrhosis                              | 0.026                    | 0.690 (0.251-1.893)                | 0.471          |
| <b><i>Antiviral agents</i></b>                  |                          |                                    |                |
| Nucleos(t)ide analog (vs. Peglyated interferon) | 0.286                    |                                    |                |
| Entecavir and tenofovir (vs. others)            | 0.790                    |                                    |                |
| <b><i>Laboratory variables</i></b>              |                          |                                    |                |
| Alanine aminotransferase (IU/L)                 | 0.023                    | 1.013 (0.969-1.059)                | 0.577          |
| Serum albumin (g/dL)                            | 0.088                    |                                    |                |
| Total bilirubin (mg/dL)                         | 0.737                    |                                    |                |
| HBeAg positivity                                | 0.521                    |                                    |                |
| log HBV DNA (IU/mL)                             | 0.080                    |                                    |                |
| Platelet count (10 <sup>9</sup> /L)             | 0.115                    |                                    |                |
| Alpha-fetoprotein (ng/mL)                       | 0.067                    |                                    |                |
| <b><i>Histologic variables</i></b>              |                          |                                    |                |
| Fibrosis stage F4 (vs. F0-3)                    | 0.001                    |                                    |                |
| <b><i>Liver stiffness measurement</i></b>       |                          |                                    |                |
| Liver stiffness (kPa)                           | <0.001                   | 1.058 (1.020-1.097)                | 0.002          |

HCC, hepatocellular carcinoma; LRE, liver-related events; CI, confidence interval; HBV, hepatitis B virus; HBeAg, hepatitis B e antigen

**Supplementary table 3. Independent risk factors of LRE development**

| Variables                                       | LRE                          |                                                             |                |
|-------------------------------------------------|------------------------------|-------------------------------------------------------------|----------------|
|                                                 | Univariate<br><i>P</i> value | Multivariate using liver stiffness<br>Hazard ratio (95% CI) | <i>P</i> value |
| <b><i>Demographic variables</i></b>             |                              |                                                             |                |
| Age (years)                                     | <0.001                       | 1.137 (1.062-1.216)                                         | <0.001         |
| Male gender                                     | 0.79                         |                                                             |                |
| Heavy alcohol consumption (vs. social and none) | 0.277                        |                                                             |                |
| Hypertension                                    | 0.504                        |                                                             |                |
| Diabetes mellitus                               | 0.004                        | 0.855 (0.266-2.747)                                         | 0.793          |
| Body mass index (kg/m <sup>2</sup> )            | 0.59                         |                                                             |                |
| Clinical cirrhosis                              |                              | 0.853 (0.330-2.210)                                         | 0.744          |
| <b><i>Antiviral agents</i></b>                  |                              |                                                             |                |
| Nucleos(t)ide analog (vs. Peglyated interferon) | 0.269                        |                                                             |                |
| Entecavir and tenofovir (vs. others)            | 0.791                        |                                                             |                |
| <b><i>Laboratory variables</i></b>              |                              |                                                             |                |
| Alanine aminotransferase (IU/L)                 | 0.019                        | 1.010 (0.967-1.054)                                         | 0.666          |
| Serum albumin (g/dL)                            | 0.018                        |                                                             |                |
| Total bilirubin (mg/dL)                         | 0.762                        |                                                             |                |
| HBeAg positivity                                | 0.709                        |                                                             |                |
| log HBV DNA (IU/mL)                             | 0.076                        |                                                             |                |
| Platelet count (10 <sup>9</sup> /L)             | 0.122                        |                                                             |                |
| Alpha-fetoprotein (ng/mL)                       | 0.038                        |                                                             |                |
| <b><i>Histologic variables</i></b>              |                              |                                                             |                |
| Fibrosis stage F4 (vs. F0-3)                    | <0.001                       |                                                             |                |
| <b><i>Liver stiffness measurement</i></b>       |                              |                                                             |                |
| Liver stiffness (kPa)                           | <0.001                       | 1.052 (1.018-1.087)                                         | 0.003          |

HCC, hepatocellular carcinoma; LRE, liver-related events; CI, confidence interval; HBV, hepatitis B virus; HBeAg, hepatitis B e antigen

**Supplementary figure 1** Flow of selecting the study population. A total of 465 patients with CHB were initially recruited. Of these, 84 patients were excluded according to our exclusion criteria. Finally, 381 patients were selected for statistical analysis. CHB, chronic hepatitis B.

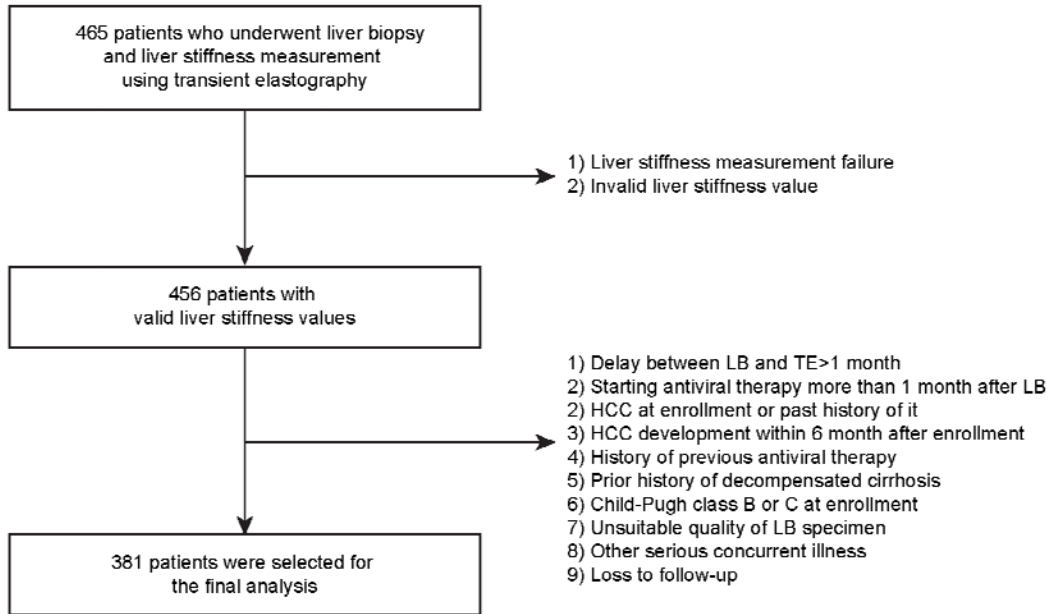

Supplement: medi-95-e2985-s001.pdf [file medi-95-e2985-s001.pdf]
